# Supplementary material for: Cisplatin and zoledronic acid: two drugs combined in a Pt(ii) complex with potential antitumor activity towards bone tumors and metastases
Source: Royal Society of Chemistry journal article supplement (doi:10.1039/d3dt00734k), 2023-01-01
Supplement: d3dt00734k1.pdf [file d3dt00734k1.pdf]

## Electronic Supporting Information

### **Cisplatin and Zoledronic acid: two drugs combined in a Pt(II) complex with potential antitumor activity towards bone tumors and metastases.**

Alessandra Barbanente,<sup>1</sup> Nicoletta Ditaranto,<sup>1</sup> Antonio Laghezza,<sup>2</sup> Paolo Tortorella,<sup>2</sup> Francesco P. Intini,<sup>1</sup> Concetta Pacifico,<sup>1</sup> Giovanni Natile,<sup>1</sup> Nicola Margiotta.<sup>1</sup>

<sup>1</sup>Dipartimento di Chimica, Università degli Studi di Bari Aldo Moro, Via E. Orabona 4, 70125 Bari, Italy;

<sup>2</sup>Dipartimento di Farmacia-Scienze del Farmaco, Università degli Studi di Bari Aldo Moro, Via E. Orabona 4, 70125 Bari, Italy.

- Elemental analysis and <sup>195</sup>Pt NMR data of the Pt precursor complexes *cis*-[PtI<sub>2</sub>(NH<sub>3</sub>)<sub>2</sub>] and *cis*-[Pt(OSO<sub>3</sub>)(OH<sub>2</sub>)(NH<sub>3</sub>)<sub>2</sub>].
- Full <sup>1</sup>H NMR spectrum of Zoledronic Acid in D<sub>2</sub>O.
- Table 1. pK<sub>a</sub> values (calculated and experimental) for Zoledronic Acid.
- Figure S1. ESI-MS of compound **1** in water.
- Figure S2. Stereochemistry and Curve-fitted Pt4f XP spectrum of the Pt(III) complex [Pt<sub>2</sub>Cl<sub>2</sub>{N(H)C(Bu<sup>t</sup>)O}<sub>4</sub>].

### Elemental analysis and $^{195}\text{Pt}$ NMR data of Pt precursor complexes

*cis*-[PtI<sub>2</sub>(NH<sub>3</sub>)<sub>2</sub>]: Anal. Calcd. for H<sub>6</sub>I<sub>2</sub>N<sub>2</sub>Pt: H, 1.25; N, 5.80%. Found: H, 1.51; N, 5.72%.  $^{195}\text{Pt}$  NMR (DMF-d<sub>7</sub>): -3199 ppm.

*cis*-[Pt(OSO<sub>3</sub>)(OH<sub>2</sub>)(NH<sub>3</sub>)<sub>2</sub>]: Anal. calcd for H<sub>8</sub>N<sub>2</sub>O<sub>5</sub>PtS: H 2.34%, N 8.24. Found: H 2.45%, N 8.09%.  $^{195}\text{Pt}$  NMR (D<sub>2</sub>O): -1555 ppm.

Full  $^1\text{H}$  NMR spectrum of Zoledronic Acid in D<sub>2</sub>O. (\* indicate TSP signals; # indicates residual H<sub>2</sub>O signal)

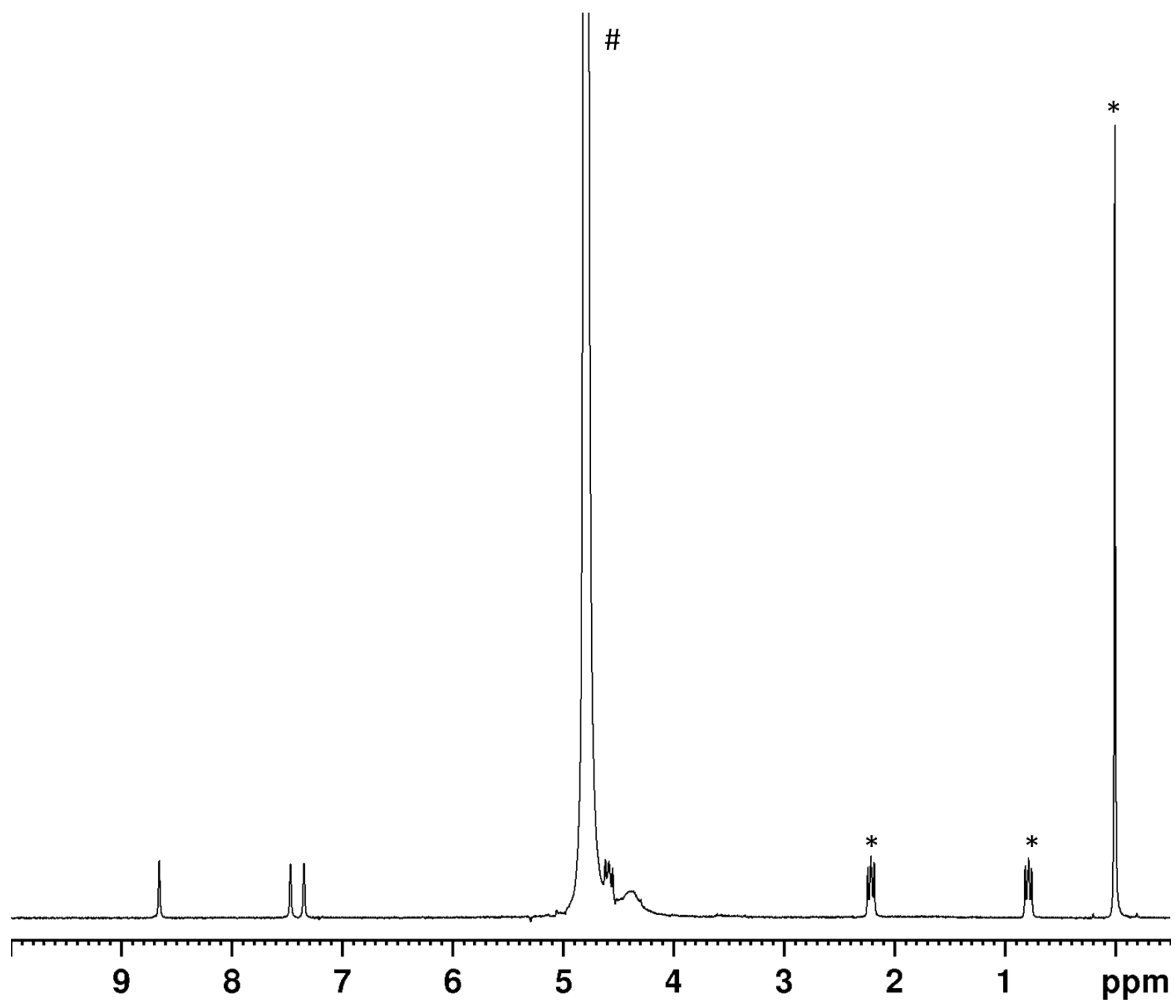

**Table 1.** pK<sub>a</sub> values (calculated and experimental) for Zoledronic Acid.

|                  | Experimental ( <sup>1</sup> H and <sup>31</sup> P NMR) | Calculated with ACD pKa LABS |
|------------------|--------------------------------------------------------|------------------------------|
| pK <sub>a1</sub> | -                                                      | 0.76                         |
| pK <sub>a2</sub> | 1.25                                                   | 0.76                         |
| pK <sub>a3</sub> | 2.32                                                   | 0.76                         |
| pK <sub>a4</sub> | 7.38                                                   | 0.76                         |
| pK <sub>a5</sub> | 7.9                                                    | 6.43                         |
| pK <sub>a6</sub> | 12.08                                                  | 9.14                         |

**Figure S1.** ESI-MS of compound **1** in water. The calculated isotope mass distribution for the specified molecular formula is shown in the inset.

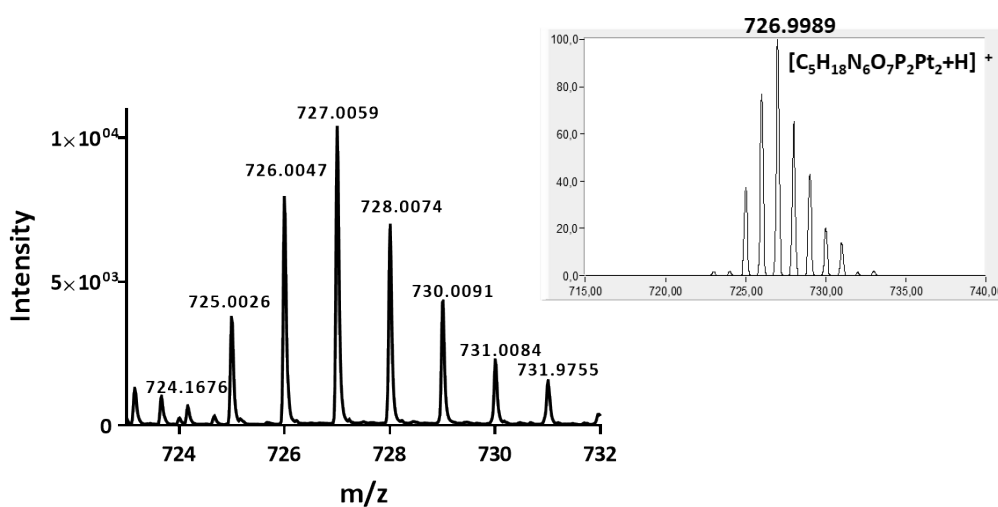

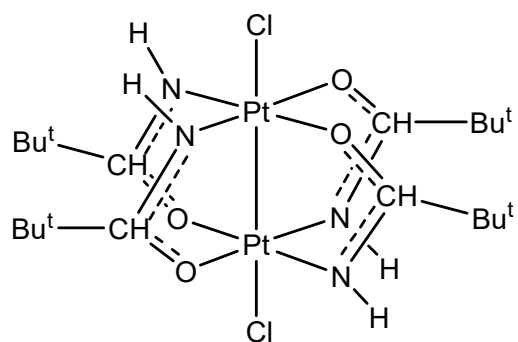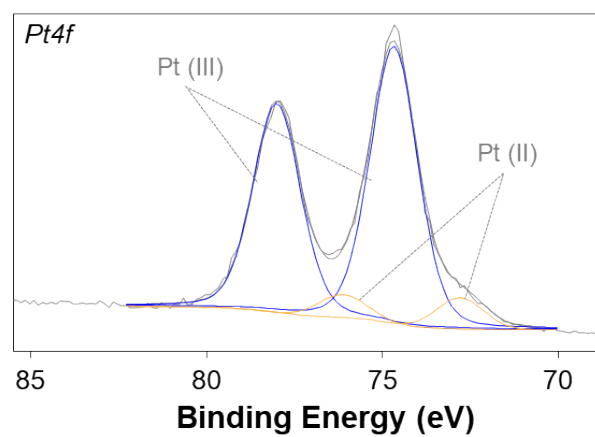

**Figure S2.** Stereochemistry and Curve-fitted Pt4f XP spectrum of the Pt(III) complex  $[\text{Pt}_2\text{Cl}_2\{\text{N}(\text{H})\text{C}(\text{Bu}^t)\text{O}\}_4]$ .
